# Supplementary material
Source: publisher figshare collection journal article supplement (https://sage.figshare.com/ndownloader/files/22114347)
Supplement: Supplementary file 1 [file 22114347]

**Supplemental eTable 1.** Parameters of multiple sequences on GE and Siemens MR scanners.

|                      | GE      |            |            |         | Siemens |             |             |         |
|----------------------|---------|------------|------------|---------|---------|-------------|-------------|---------|
|                      | 3D TOF  | 3D CUBE T1 | 3D CUBE PD | MP RAGE | 3D TOF  | 3D SPACE T1 | 3D SPACE PD | MP RAGE |
| TR, ms               | Minimum | 600        | 1500       | Minimum | 24      | 800         | 1700        | 776.13  |
| TE, ms               | Minimum | Minimum    | 40         | 3.3     | 4.32    | 22          | 23          | 5.8     |
| FOV, mm <sup>2</sup> | 240×220 | 240×220    | 240×220    | 240×240 | 140×140 | 180×168     | 180×180     | 144×144 |
| Matrix               | 512×512 | 480×480    | 384×384    | 256×256 | 256×256 | 256×251     | 320×304     | 240×240 |
| Slice thickness, mm  | 2       | 0.8        | 0.8        | 0.8     | 0.9     | 0.8         | 0.6         | 1       |
| Flip angle, degree   | 20      | 90         | 90         | 12      | 18      | 120         | 120         | 15      |
| Scan time, min       | 1:53    | 3:33       | 2:40       | 2:18    | 2:14    | 4:40        | 4:25        | 2:39    |

Abbreviations: 3D=3 dimensional; T1=T1-weighted imaging; PD=proton weighted imaging; MPRAGE=magnetization-prepared rapid acquisition with gradient-echo sequence; TR=repitition time; TE=echo time; FOV=field of view; TOF = time of flight.

**Supplemental eFigure 1.** The measurement of remodeling index.

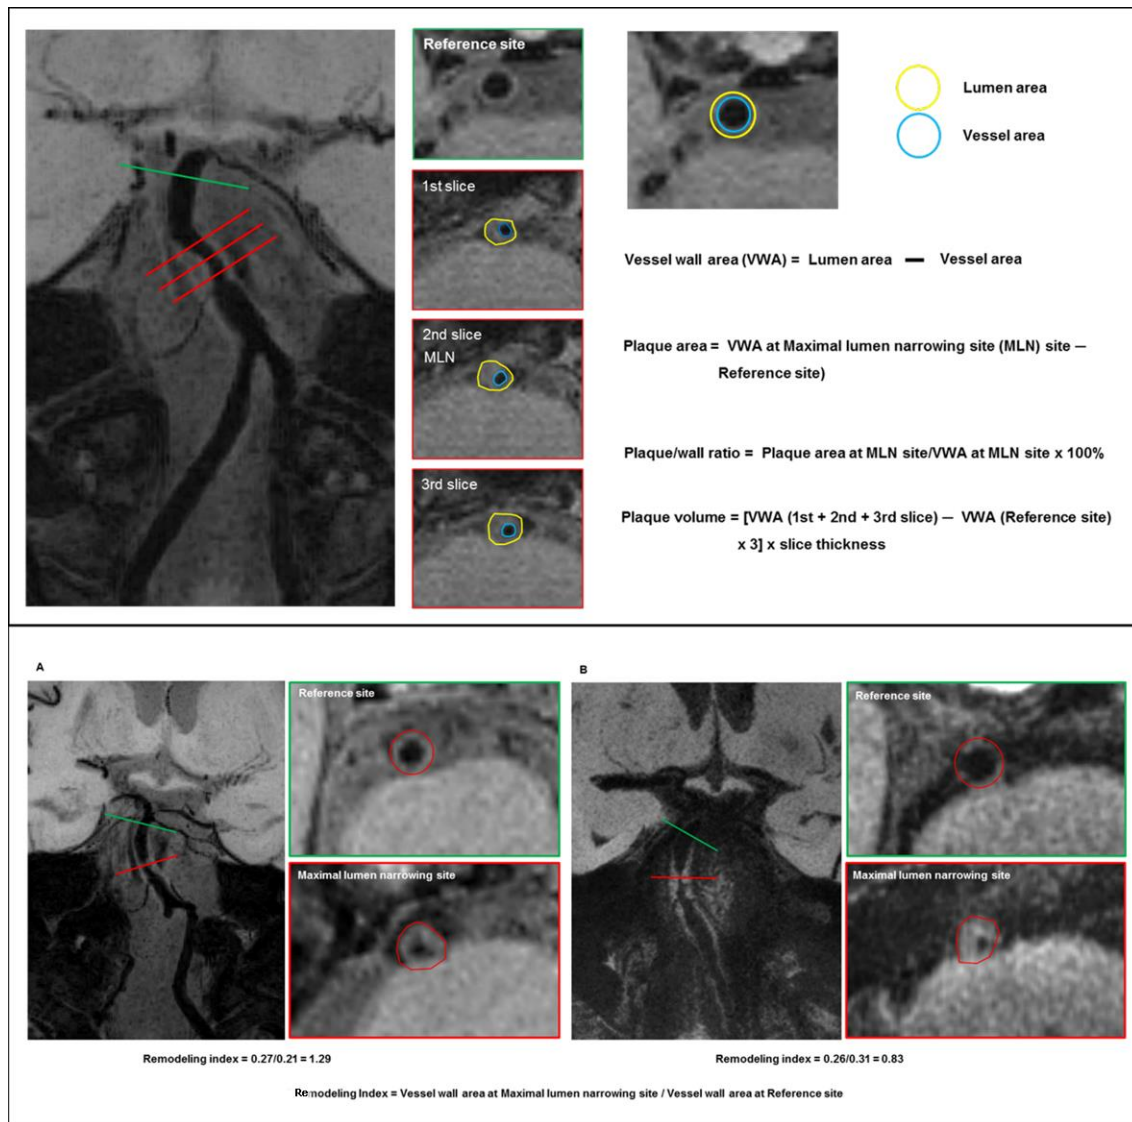

Remodeling index  $\geq 1.05$  was defined as positive remodeling, 0.95 and 1.05 as intermediate remodeling,  $\leq 0.95$  as negative remodeling.

**Supplemental eFigure 2.** The schema chart of plaque distribution.

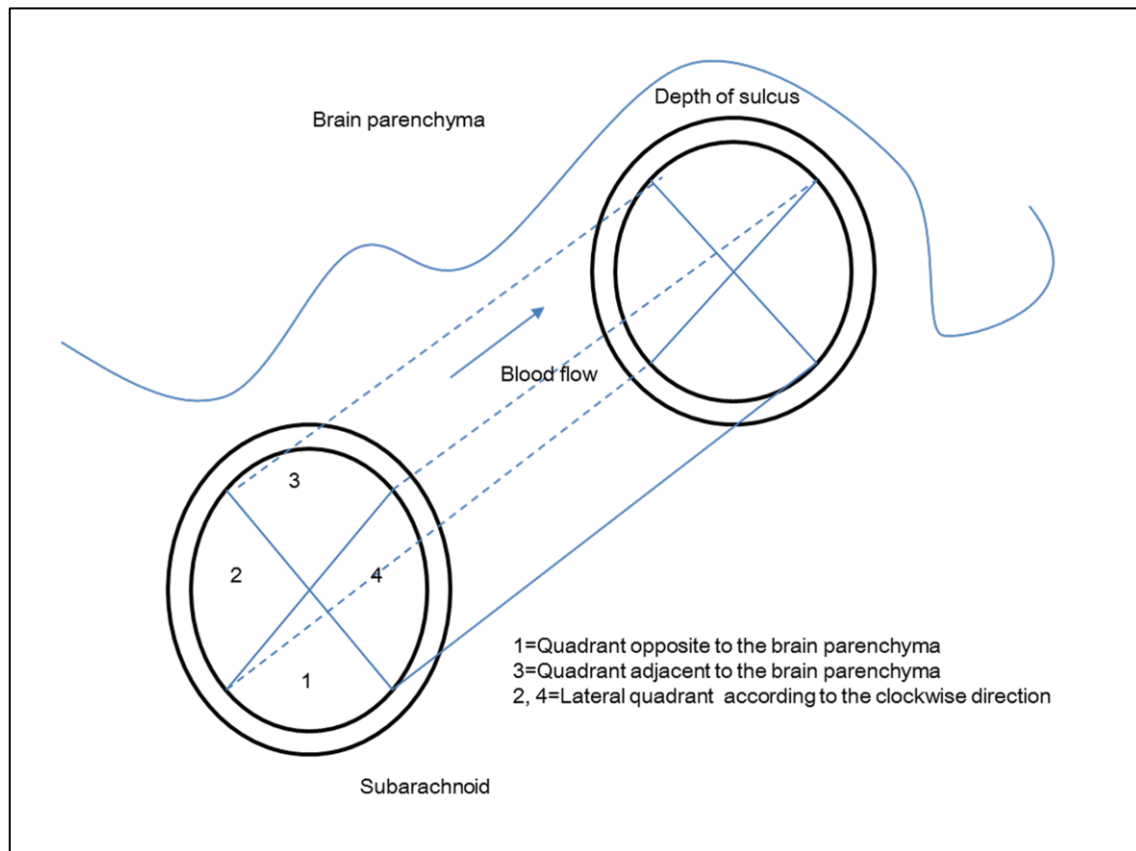

Plaque that was distributed  $\geq 3$  quadrants of the lumen perimeter was defined as diffuse and that involving  $\leq 2$  was defined as non-diffuse.

**Supplemental eFigure 3.** The example of intraplaque hemorrhage.

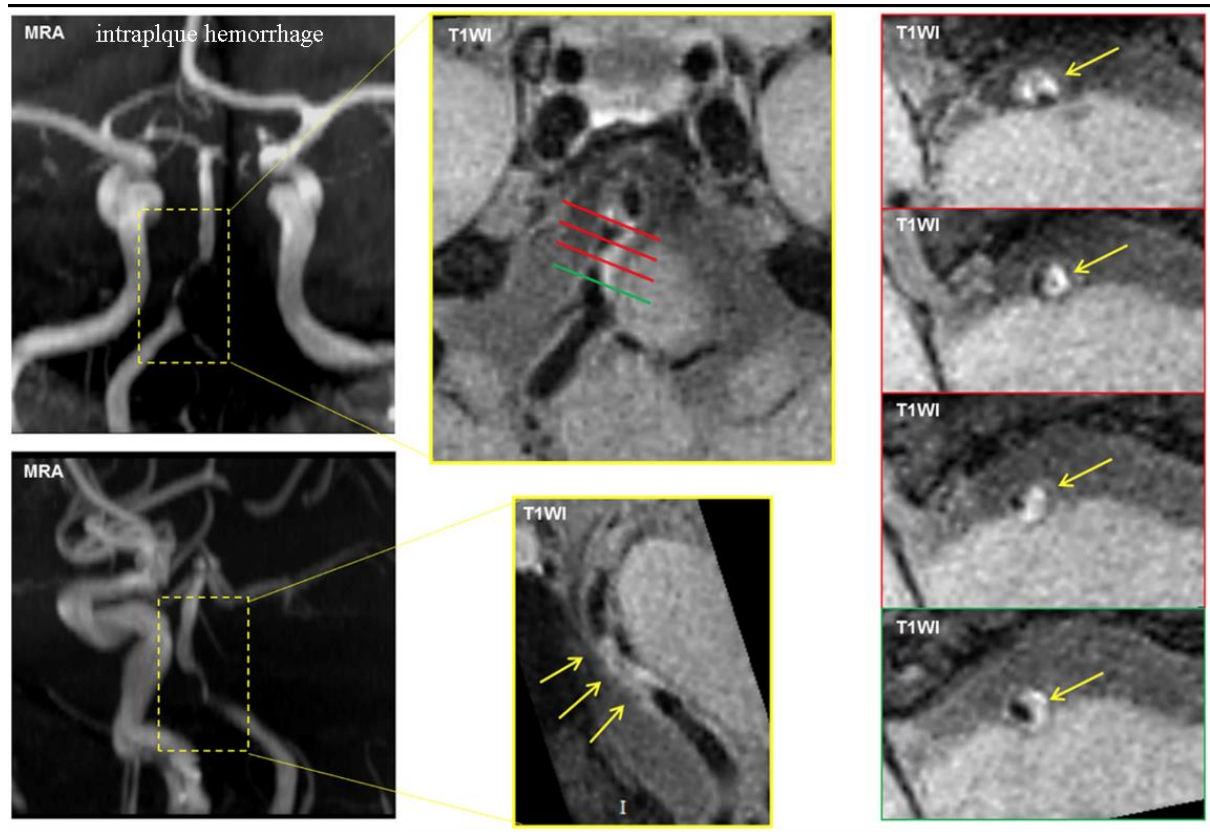

Intra-plaque hemorrhage was defined as a signal intensity greater than 150% of that of the adjacent gray matter on all pulse sequences.

**Supplemental eFigure 4.** The example of grade of plaque enhancement.

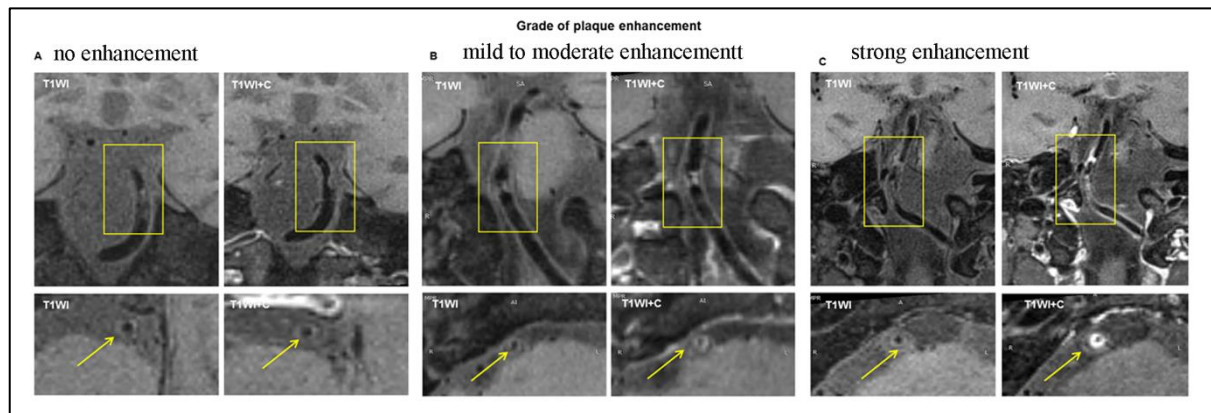

Enhancement was classified into three different grades: non-enhancement, mediate enhancement, and strong enhancement. Mediate enhancement was defined as less than that of the pituitary infundibulum. Strong enhancement was equal to or stronger than that of the pituitary infundibulum.
